# Supplementary material
Source: MDPI journal article supplement (https://www.mdpi.com/2072-4292/14/19/4751)
Supplement: s1 [file s1]

## **Supplementary information for**

“Optimizing the land use and land cover  
pattern to increase its contribution to carbon  
neutrality”

# Content

**Table S1. Carbon density of each land use type in the InVEST model..... 1**

**Table S2. Conversion factor to standard coal from different types of energy and carbon emission coefficient..... 2**

**Figure S1. Spatial and temporal distribution of carbon storage in the study area from 2000 to 2020..... 3**

**References..... 3**

**Table S1. Carbon density of each land use type in the InVEST model**

In this study, it should be noted that construction land is hardened surface, so its carbon density was set to 0; Water as a special land-use type was also set to 0. Barren land only was took into account the carbon storage of soil. The estimation of vegetation carbon density was mainly obtained by converting parameters such as vegetation biomass and vegetation carbon content rate measured in the field, where the above-ground and below-ground biomass of forest and below-ground biomass of cropland [1] and vegetation carbon content rate were obtained based on relevant studies [2-4]. Soil carbon densities were calculated using field measurements except for barren.

Table S1. Carbon density of each land use type in the InVEST model

| LULC types        | Carbon Density (Mg C/ha) |      |       |      | Source                                                                 |
|-------------------|--------------------------|------|-------|------|------------------------------------------------------------------------|
|                   | AGC                      | BGC  | SOC   | DOC  |                                                                        |
| Cropland          | 3.03                     | 1.10 | 11.48 | 0.00 | Measured data in the field [1, 3, 4]                                   |
| Forest            | 44.24                    | 7.49 | 27.27 | 3.30 | Measured data in the field [2]                                         |
| Grassland         | 1.50                     | 3.54 | 17.36 | 0.29 | Measured data in the field                                             |
| Water             | 0.00                     | 0.00 | 0.00  | 0.00 | -                                                                      |
|                   |                          |      |       |      | A dataset of carbon density in Chinese terrestrial ecosystems (2010s), |
| Barren land       | 0.00                     | 0.00 | 3.18  | 0.00 | <a href="http://www.nesdc.org.cn/">http://www.nesdc.org.cn/</a>        |
| Construction land | 0.00                     | 0.00 | 0.00  | 0.00 | -                                                                      |

Note: AGC-aboveground carbon storage; BGC-belowground carbon storage; SOC-soil organic carbon storage; DOC-dead organic matter carbon storage.

**Table S2. Conversion factor to standard coal from different types of energy and carbon emission coefficient**

Table S2. Conversion factor to standard coal from different types of energy and carbon emission coefficient

| Energy types   | Conversion factor to standard coal | Carbon emission coefficient |
|----------------|------------------------------------|-----------------------------|
| Raw coal       | 0.7143                             | 0.7559                      |
| Coke           | 0.9714                             | 0.8550                      |
| Crude oil      | 1.4286                             | 0.5857                      |
| Gasoline       | 1.4714                             | 0.5538                      |
| Kerosene       | 1.4714                             | 0.5714                      |
| Diesel oil     | 1.4571                             | 0.5921                      |
| Fuel oil       | 1.4286                             | 0.6185                      |
| Natural gas    | 1.2143                             | 0.4483                      |
| Electric power | 0.1229                             | 0.7935                      |

**Figure S1. Spatial and temporal distribution of carbon storage in the study area from 2000 to 2020**

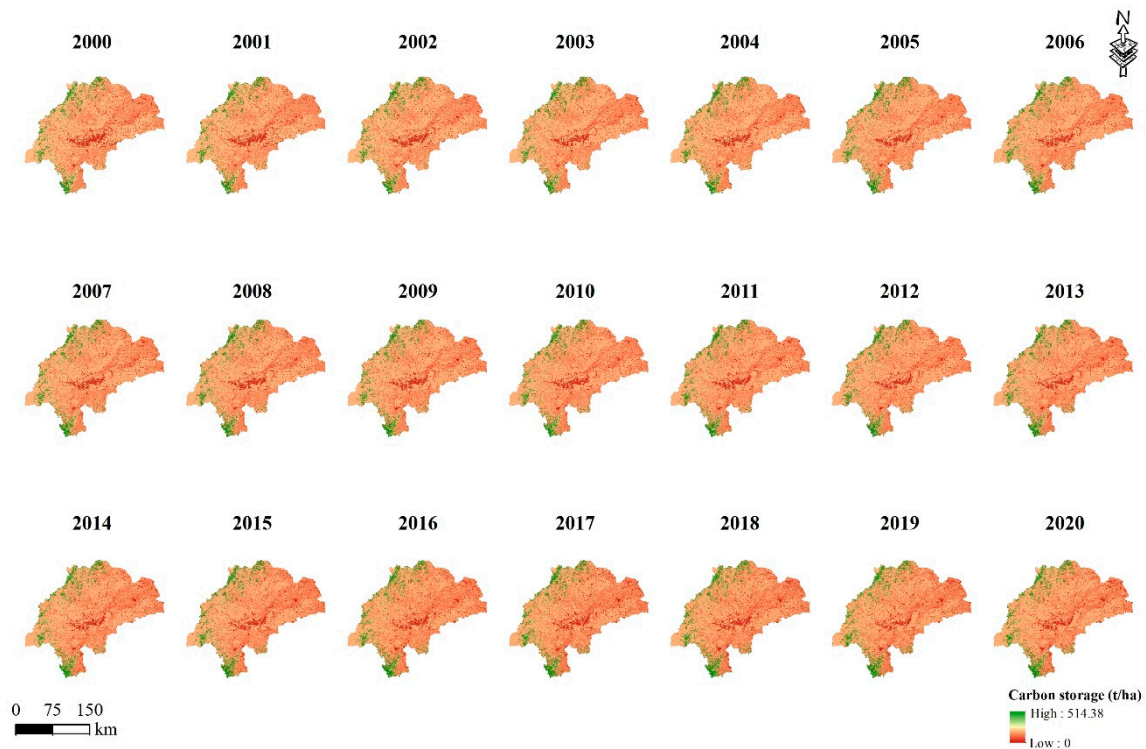

Figure S1. Spatial and temporal distribution of carbon storage in the study area from 2000 to 2020

## References

1. Jin, S.; Yang, F., Carbon stock estimation and analysis of crops in Jiangxi. *Guangdong Agricultural Sciences* **2011**, 38, (02), 216-218.
2. Hu, F.; Yan, Y.; Liu, L.; Cao, Y.; Ma, Y.; Chen, M.; Liu, Z., Biomass allocation patterns in the temperate typical steppe of Inner Mongolia. *Acta Prataculturae Sinica* **2017**, 26, (04), 33-42.
3. Liu, Y.; Wang, T.; Gao, Y.; Dang, X.; Wang, J.; Chen, Y.; Jia, C., Characteristics and distribution pattern of carbon storage variation of the corn farmland ecosystem in the ecotone between agriculture and animal husbandry. *Agricultural Research in the Arid Areas* **2015**, 33, (02), 214-219+229.
4. Luo, H., Advances on carbon storage in crops of China. *Ecology and Environmental Sciences* **2014**, 23, (04), 692-697.
